# Supplementary material
Source: Springer Nature journal article supplement (https://www.springermedizin.de/resource/supplementary/12943_2010_814_MOESM15_ESM.pdf/9554896)

**A**MCF-7  
ER $\alpha$ 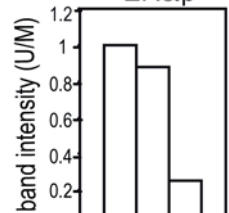

IL-6 - - +  
5azadC - + -

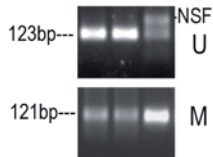**B**ER $\alpha$ 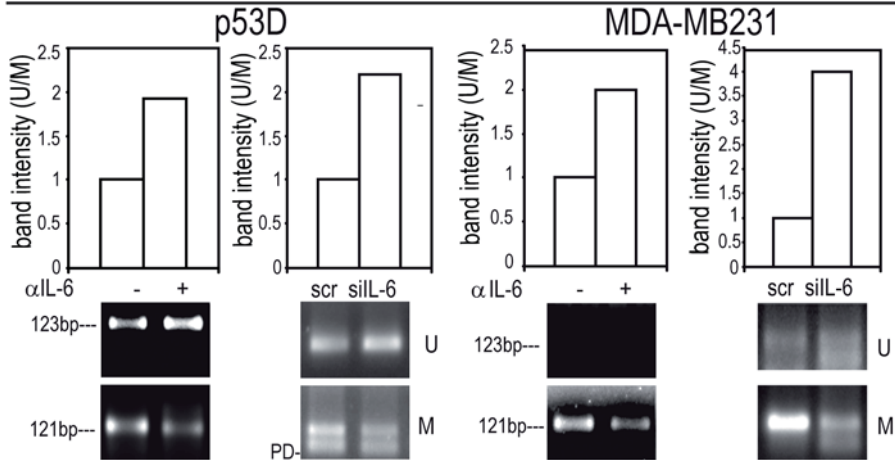

p53D

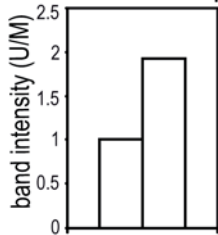 $\alpha$ IL-6 - +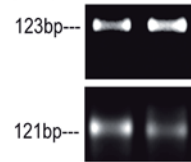

p53D

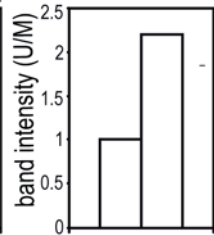

scr siIL-6

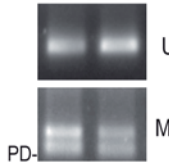ER $\alpha$ 

MDA-MB231

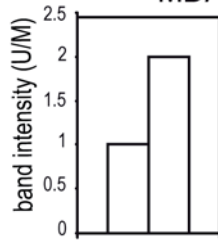 $\alpha$ IL-6 - +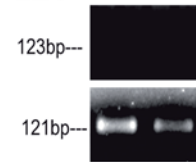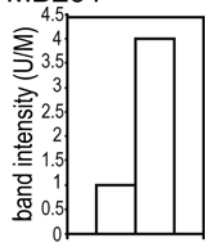

scr siIL-6

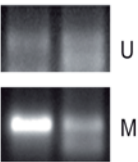

Supplement: MOESM15 [file 9554896]
